# Supplementary material
Source: PubMed Central journal article supplement (PMC3413459)
Supplement: NIHMS384710-supplement-01.pdf [file NIHMS384710-supplement-01.pdf]

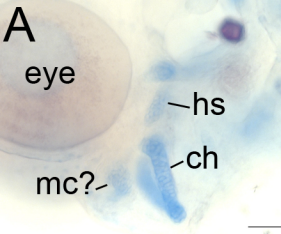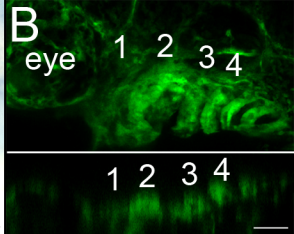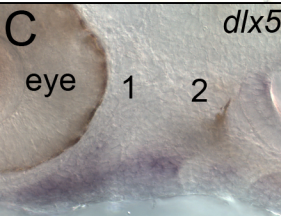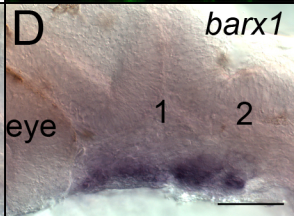

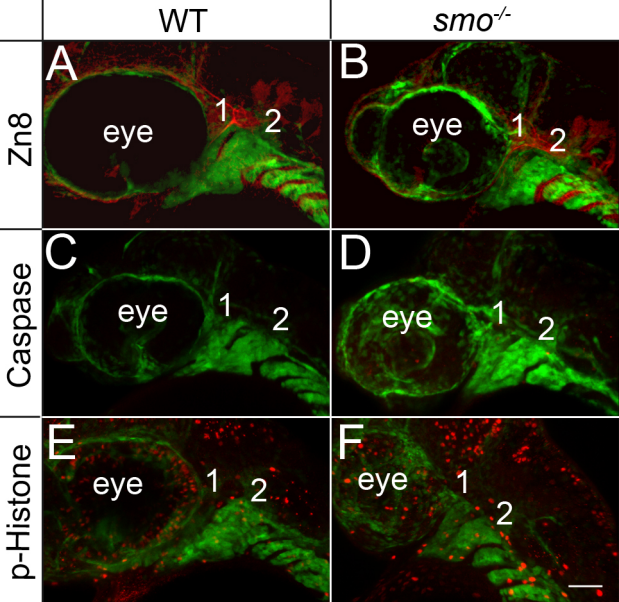

Swartz et al., Supp. Fig. 2

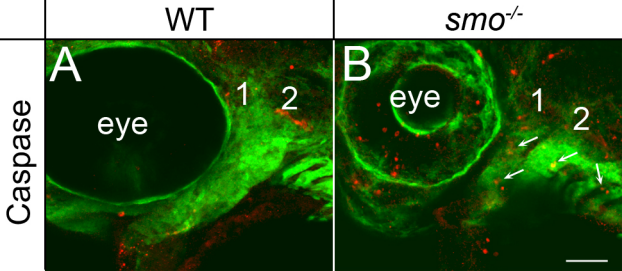

Swartz et al., Supp Fig. 3

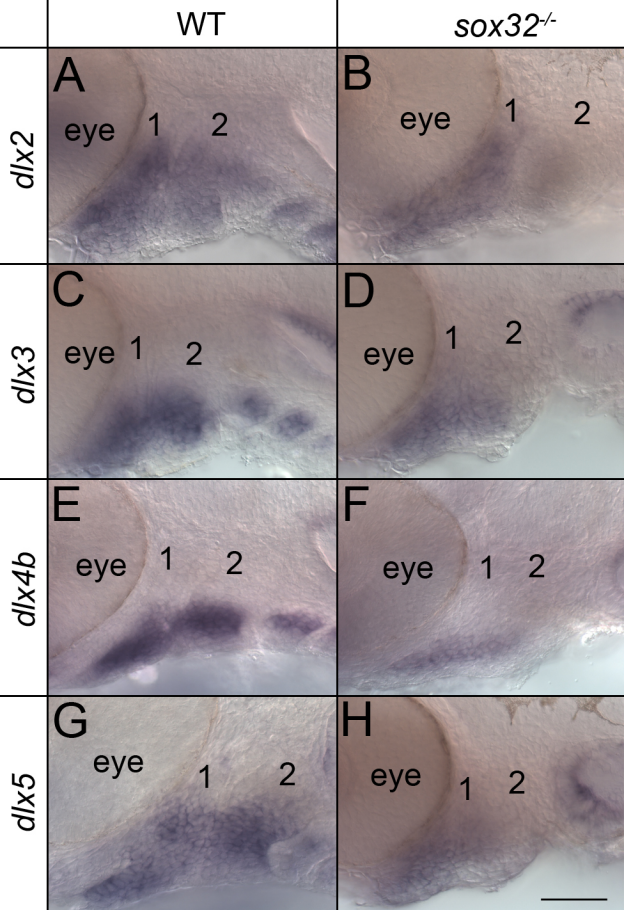

Swartz et al., Supp. Fig. 4

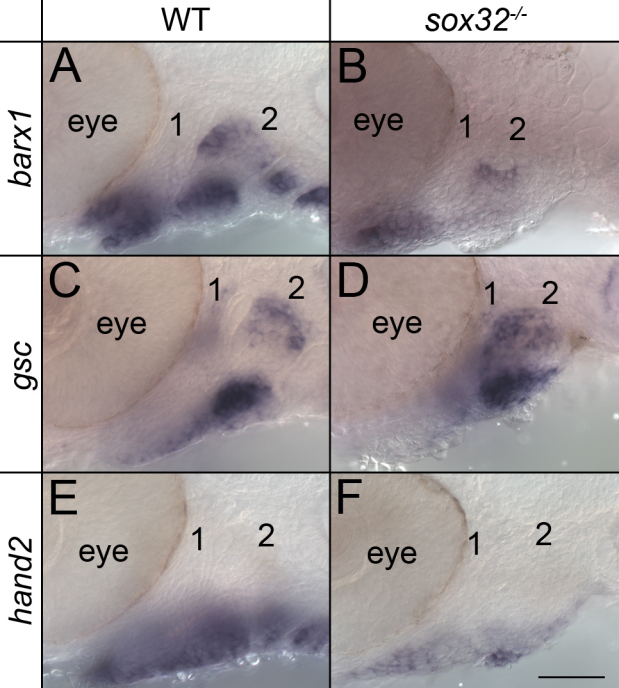

Swartz et al., Supp. Fig. 5

mutant side

transplant side

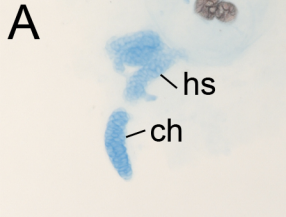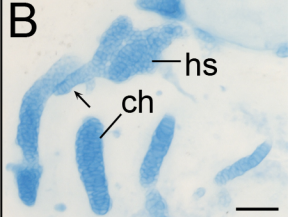

Swartz et al., Supp Fig. 6

Overlay

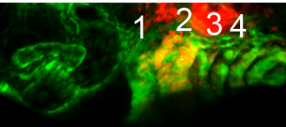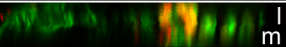

WT cells

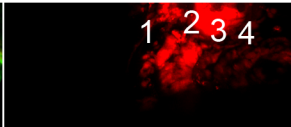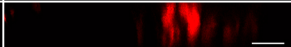

Swartz et al., Supp Fig 7

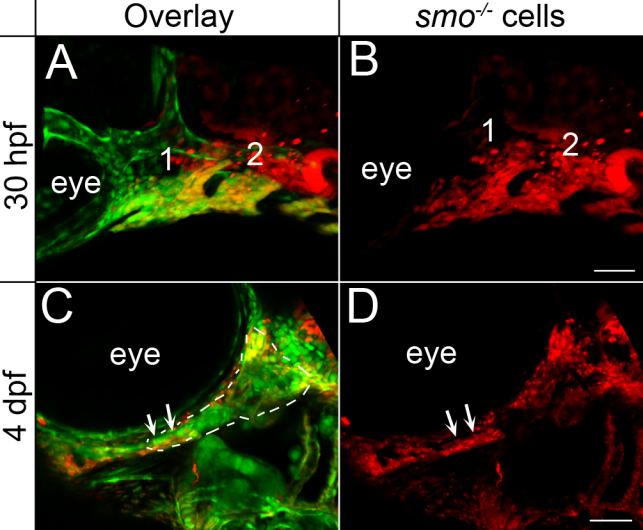

Swartz et al., Fig 8



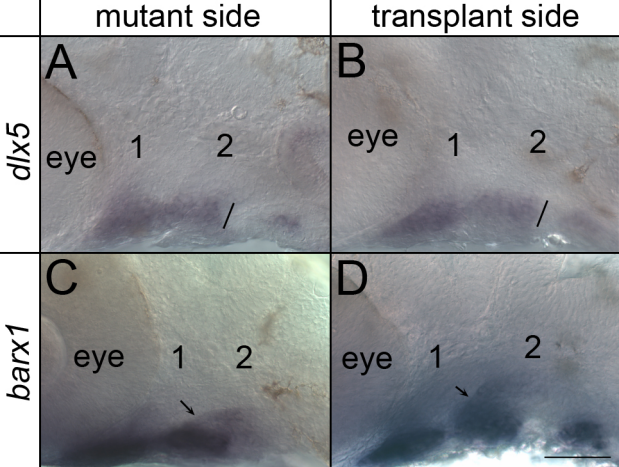

Swartz et al., Supp Fig 9

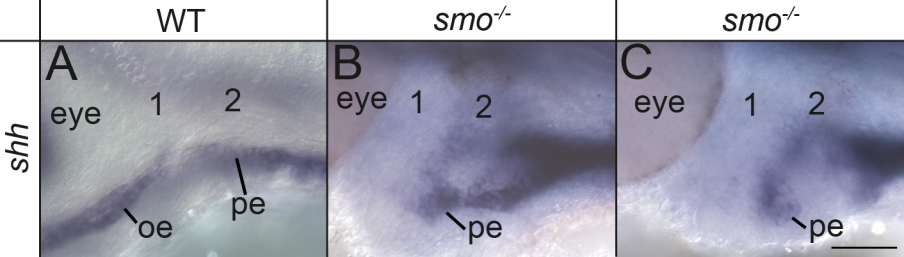

Swartz et al., Supp. Fig. 10
